# Supplementary material for: Continuous and high-precision atmospheric concentration measurementsof COS, CO 2 , CO and H 2 O using a quantum cascade laser spectrometer (QCLS)
Source: Copernicus journal article supplement (doi:10.5194/amt-9-5293-2016), 2016-11-01
Supplement: Supplementary file 1 [file amt-9-5293-2016-supplement.zip]

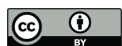

## *Supplement of*

# **Continuous and high-precision atmospheric concentration measurements of COS, CO<sub>2</sub>, CO and H<sub>2</sub>O using a quantum cascade laser spectrometer (QCLS)**

**Linda M. J. Kooijmans et al.**

*Correspondence to:* Huilin Chen ([huilin.chen@rug.nl](mailto:huilin.chen@rug.nl))

- [amt-9-5293-2016-supplement-title-page.pdf](#)
- [Allan\\_deviation\\_timeseries.txt](#)
- [Water\\_Vapor\\_experiments.txt](#)

The copyright of individual parts of the supplement might differ from the CC-BY 3.0 licence.
